# Supplementary material for: Polymeric ionic liquid modified reduced graphene oxide as adsorbent for highly selective isolation of acidic protein
Source: Royal Society of Chemistry journal article supplement (doi:10.1039/c4ra09808k), 2014-01-01

## Supporting Information

### **Polymeric ionic liquid modified reduced graphene oxide as adsorbent for highly selective isolation of acidic protein**

Jia-wei Liu<sup>a#</sup>, Meng-meng Wang<sup>a#</sup>, Yue Zhang<sup>a</sup>, Lu Han<sup>a</sup>, Xu-wei Chen<sup>a\*</sup> and Jian-hua Wang<sup>a,b\*</sup>

*<sup>a</sup>Research Center for Analytical Sciences, College of Sciences, Northeastern University,  
Box 332, Shenyang 110819, China*

*<sup>b</sup>Collaborative Innovation Center of Chemical Science and Engineering, Tianjin,  
300071, China*

Table S1. Zeta potentials of the PIL-rGO@SiO<sub>2</sub> nano-hybrid at various pH values.

Table S2. Adsorption efficiencies of Ova and Lys onto pure SiO<sub>2</sub> nanoparticles, rGO nanosheets and PIL-rGO@SiO<sub>2</sub> nano-hybrid. The concentration and volume of proteins: 150 mg L<sup>-1</sup> and 1.0 mL; amount of adsorbent: 3 mg; adsorption time: 30 min; pH 5.

Fig. S1. The variation of zeta potentials of PIL-rGO with the PIL/GO mass ratio.

Fig. S2. The adsorption isotherm for Ova on the PIL-rGO@SiO<sub>2</sub> nano-hybrid. The volume of Ova solution: 1.0 mL; the amount of PIL-rGO@SiO<sub>2</sub> nano-hybrid: 3 mg; the adsorption time: 30 min; pH 5.

Table S1

| pH | Zeta potential/eV |
|----|-------------------|
| 3  | 49.3              |
| 5  | 47.6              |
| 7  | 48.1              |
| 9  | 38.1              |
| 11 | 24.3              |
| 12 | 25.6              |

Table S2

| Adsorbent                | Adsorption efficiency (%) |      |
|--------------------------|---------------------------|------|
|                          | Ova                       | Lys  |
| SiO <sub>2</sub>         | 62.8                      | 22.5 |
| rGO                      | 86.7                      | 67.5 |
| PIL-rGO@SiO <sub>2</sub> | 95.2                      | 5.2  |

Fig. S1

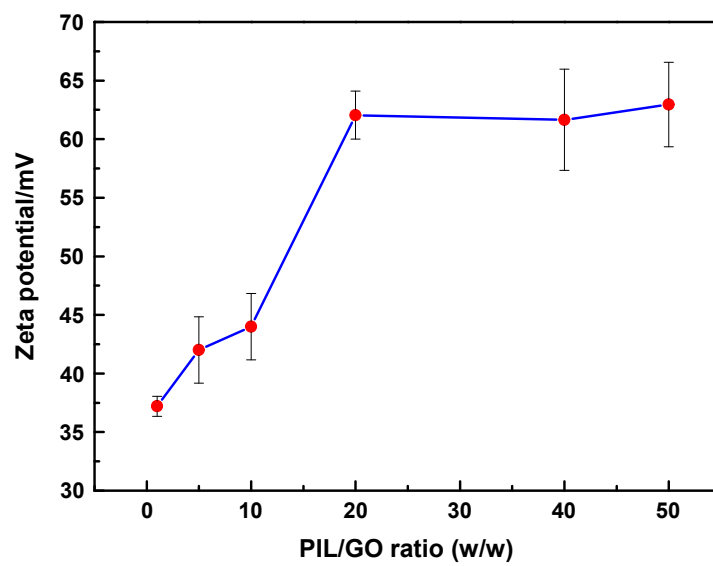

Fig. S2

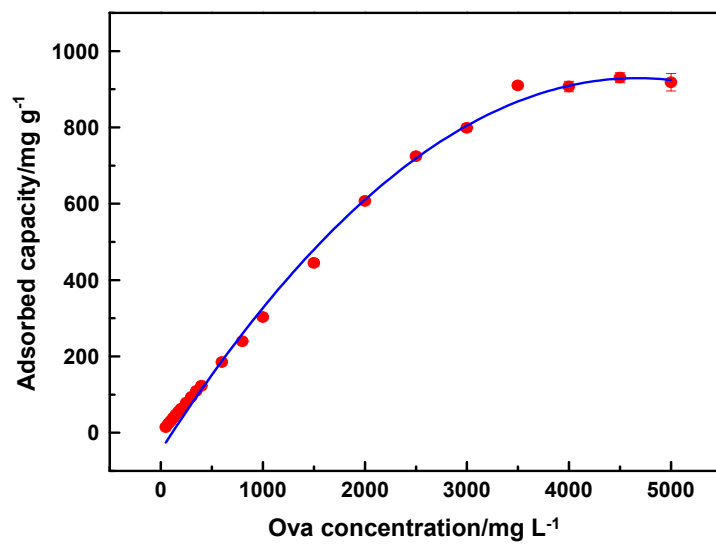

Supplement: c4ra09808k1.pdf [file c4ra09808k1.pdf]
